# Supplementary material for: Stem cells and beta cell replacement therapy: a prospective health technology assessment study
Source: Springer Nature journal article supplement (doi:10.1186/s12902-018-0233-7), 2018-01-30
Supplement: MOESM1 [file 15426236]

$$Dose\ costs = COG_{upstream} \times factor_{COG\ downstream} \times factor_{additional\ regulation} \quad (1)$$
